# Supplementary material
Source: PubMed Central journal article supplement (PMC7024000)
Supplement: NIHMS1545997-supplement-2.pdf [file NIHMS1545997-supplement-2.pdf]

**Table S1:** Summary of disease in *FVB* mice following MmuPV1 infection of the female reproductive tract.

| Treatment group   | Group size, <i>n</i> | No disease      | Dysplasia only |             |             | SCC Cancer      |
|-------------------|----------------------|-----------------|----------------|-------------|-------------|-----------------|
|                   |                      | Cervix (Vagina) | CIN1 (VIN1)    | CIN2 (VIN2) | CIN3 (VIN3) | Cervix (Vagina) |
| Mock              | 4                    | 2 (2)           | 2 (1)          | 0 (1)       | 0 (0)       | 0 (0)           |
| Mock + E2         | 3                    | 0 (0)           | 3 (3)          | 0 (0)       | 0 (0)       | 0 (0)           |
| Mock + UVB        | 3                    | 1 (0)           | 2 (0)          | 0 (3)       | 0 (0)       | 0 (0)           |
| Mock + UVB + E2   | 3                    | 3 (3)           | 0 (0)          | 0 (0)       | 0 (0)       | 0 (0)           |
| MmuPV1 Only       | 3                    | 1 (1)           | 0 (0)          | 2 (2)       | 0 (0)       | 0 (0)           |
| MmuPV1 + E2       | 3                    | 0 (0)           | 0 (0)          | 1 (1)       | 2 (2)       | 0 (0) *         |
| MmuPV1 + UVB      | 2                    | 2 (1)           | 0 (0)          | 0 (0)       | 0 (1)       | 0 (0)           |
| MmuPV1 + UVB + E2 | 4                    | 0 (0)           | 0 (0)          | 1 (0)       | 3 (1)       | 0 (3) **        |

Mice were scored histopathologically for the worst disease present in the cervix and vagina (in parentheses). CIN, cervical intraepithelial neoplasia; VIN, vaginal intraepithelial neoplasia.

Two-Sided Wilcoxon Rank Sum Test was used to compare overall cervicovaginal disease severity (worst disease in cervix and vagina combined).

\*  $p=0.05$  MmuPV1+E2 vs. Mock+E2

\*\*  $p= 0.03$  MmuPV1+UVB+E2 vs. Mock+UVB+E2

**Table S2:** Summary of disease in *K14E5* transgenic mice following MmuPV1 infection of the female reproductive tract.

| Treatment group   | Group size, <i>n</i> | No disease      | Dysplasia only |             |             | SCC Cancer      |
|-------------------|----------------------|-----------------|----------------|-------------|-------------|-----------------|
|                   |                      | Cervix (Vagina) | CIN1 (VIN1)    | CIN2 (VIN2) | CIN3 (VIN3) | Cervix (Vagina) |
| Mock              | 3                    | 3 (3)           | 0 (0)          | 0 (0)       | 0 (0)       | 0 (0)           |
| Mock + E2         | 3                    | 1 (1)           | 0 (0)          | 2 (2)       | 0 (0)       | 0 (0)           |
| Mock + UVB        | 2                    | 2 (2)           | 0 (0)          | 0 (0)       | 0 (0)       | 0 (0)           |
| Mock + UVB + E2   | 3                    | 2 (2)           | 0 (0)          | 1 (1)       | 0 (0)       | 0 (0)           |
| MmuPV1 Only       | 3                    | 2 (2)           | 0 (0)          | 1 (0)       | 0 (1)       | 0 (0)           |
| MmuPV1 + E2       | 3                    | 0 (0)           | 0 (0)          | 0 (0)       | 2 (0)       | 1 (3) *         |
| MmuPV1 + UVB      | 3                    | 1 (1)           | 0 (0)          | 0 (0)       | 2 (2)       | 0 (0)           |
| MmuPV1 + UVB + E2 | 3                    | 0 (0)           | 0 (0)          | 1 (2)       | 0 (0)       | 2 (3) **        |

Mice were scored histopathologically for the worst disease present in the cervix and vagina (in parentheses). CIN, cervical intraepithelial neoplasia; VIN, vaginal intraepithelial neoplasia.

Two-Sided Wilcoxon Rank Sum Test was used to compare overall cervicovaginal disease severity (worst disease in cervix and vagina combined).

\*  $p=0.05$  MmuPV1+E2 vs. Mock+E2

\*\*  $p=0.05$  MmuPV1+UVB+E2 vs. Mock+UVB+E2
